# Supplementary material
Source: ML conference proceedings conference paper supplement (https://proceedings.mlr.press/v70/zoghi17a.html)
Supplement: Supplementary file [file zoghi17a-supp.pdf]

**A. Notation**

| Symbol                            | Definition                                                                                                              |
|-----------------------------------|-------------------------------------------------------------------------------------------------------------------------|
| $\alpha(d)$                       | Attraction probability of item $d$                                                                                      |
| $\alpha_{\max}$                   | Highest attraction probability, $\alpha(1)$                                                                             |
| $A$                               | Binary attraction vector, where $A(d)$ is the attraction indicator of item $d$                                          |
| $P_\alpha$                        | Distribution over binary attraction vectors                                                                             |
| $\mathcal{A}$                     | Set of active batches                                                                                                   |
| $b_{\max}$                        | Index of the last created batch                                                                                         |
| $\mathbf{B}_{b,\ell}$             | Items in stage $\ell$ of batch $b$                                                                                      |
| $c_t(k)$                          | Indicator of the click on position $k$ at time $t$                                                                      |
| $c_{b,\ell}(d)$                   | Number of observed clicks on item $d$ in stage $\ell$ of batch $b$                                                      |
| $\hat{c}_{b,\ell}(d)$             | Estimated probability of clicking on item $d$ in stage $\ell$ of batch $b$                                              |
| $\bar{c}_{b,\ell}(d)$             | Probability of clicking on item $d$ in stage $\ell$ of batch $b$ , $\mathbb{E}[\hat{c}_{b,\ell}(d)]$                    |
| $\mathcal{D}$                     | Ground set of items $[L]$ such that $\alpha(1) \geq \dots \geq \alpha(L)$                                               |
| $\delta_T$                        | $\log T + 3 \log \log T$                                                                                                |
| $\tilde{\Delta}_\ell$             | $2^{-\ell}$                                                                                                             |
| $\mathbf{I}_b$                    | Interval of positions in batch $b$                                                                                      |
| $K$                               | Number of positions to display items                                                                                    |
| $\text{len}(b)$                   | Number of positions to display items in batch $b$                                                                       |
| $L$                               | Number of items                                                                                                         |
| $\mathbf{L}_{b,\ell}(d)$          | Lower confidence bound of item $d$ , in stage $\ell$ of batch $b$                                                       |
| $n_\ell$                          | Number of times that each item is observed in stage $\ell$                                                              |
| $\mathbf{n}_{b,\ell}$             | Number of observations of item $d$ in stage $\ell$ of batch $b$                                                         |
| $\Pi_K(\mathcal{D})$              | Set of all $K$ -tuples with distinct elements from $\mathcal{D}$                                                        |
| $r(\mathcal{R}, A, X)$            | Reward of list $\mathcal{R}$ , for attraction and examination indicators $A$ and $X$                                    |
| $r(\mathcal{R}, \alpha, \chi)$    | Expected reward of list $\mathcal{R}$                                                                                   |
| $\mathcal{R} = (d_1, \dots, d_K)$ | List of $K$ items, where $d_k$ is the $k$ -th item in $\mathcal{R}$                                                     |
| $\mathcal{R}^* = (1, \dots, K)$   | Optimal list of $K$ items                                                                                               |
| $R(\mathcal{R}, A, X)$            | Regret of list $\mathcal{R}$ , for attraction and examination indicators $A$ and $X$                                    |
| $R(T)$                            | Expected cumulative regret in $T$ steps                                                                                 |
| $T$                               | Horizon of the experiment                                                                                               |
| $\mathbf{U}_{b,\ell}(d)$          | Upper confidence bound of item $d$ , in stage $\ell$ of batch $b$                                                       |
| $\chi(\mathcal{R}, k)$            | Examination probability of position $k$ in list $\mathcal{R}$                                                           |
| $\chi^*(k)$                       | Examination probability of position $k$ in the optimal list $\mathcal{R}^*$                                             |
| $X$                               | Binary examination matrix, where $X(\mathcal{R}, k)$ is the examination indicator of position $k$ in list $\mathcal{R}$ |
| $P_\chi$                          | Distribution over binary examination matrices                                                                           |

## B. Proof of Theorem 1

Let  $\mathbf{R}_{b,\ell}$  be the stochastic regret associated with stage  $\ell$  of batch  $b$ . Then the expected  $T$ -step regret of MergeRank can be decomposed as

$$R(T) \leq \mathbb{E} \left[ \sum_{b=1}^{2K} \sum_{\ell=0}^{T-1} \mathbf{R}_{b,\ell} \right]$$

because the maximum number of batches is  $2K$ . Let

$$\bar{\chi}_{b,\ell}(d) = \frac{\bar{c}_{b,\ell}(d)}{\alpha(d)} \quad (12)$$

be the *average examination probability* of item  $d$  in stage  $\ell$  of batch  $b$ . Let

$$\begin{aligned} \mathcal{E}_{b,\ell} = & \left\{ \begin{array}{l} \text{Event 1: } \forall d \in \mathbf{B}_{b,\ell} : \bar{c}_{b,\ell}(d) \in [\mathbf{L}_{b,\ell}(d), \mathbf{U}_{b,\ell}(d)], \\ \text{Event 2: } \forall \mathbf{I}_b \in [K]^2, d \in \mathbf{B}_{b,\ell}, d^* \in \mathbf{B}_{b,\ell} \cap [K] \text{ s.t. } \Delta = \alpha(d^*) - \alpha(d) > 0 : \\ \quad n_\ell \geq \frac{16K}{\chi^*(\mathbf{I}_b(1))(1 - \alpha_{\max})\Delta^2} \log T \implies \hat{c}_{b,\ell}(d) \leq \bar{\chi}_{b,\ell}(d)[\alpha(d) + \Delta/4], \\ \text{Event 3: } \forall \mathbf{I}_b \in [K]^2, d \in \mathbf{B}_{b,\ell}, d^* \in \mathbf{B}_{b,\ell} \cap [K] \text{ s.t. } \Delta = \alpha(d^*) - \alpha(d) > 0 : \\ \quad n_\ell \geq \frac{16K}{\chi^*(\mathbf{I}_b(1))(1 - \alpha_{\max})\Delta^2} \log T \implies \hat{c}_{b,\ell}(d^*) \geq \bar{\chi}_{b,\ell}(d^*)[\alpha(d^*) - \Delta/4] \end{array} \right\} \end{aligned}$$

be the “good event” in stage  $\ell$  of batch  $b$ , where  $\bar{c}_{b,\ell}(d)$  is the probability of clicking on item  $d$  in stage  $\ell$  of batch  $b$ , which is defined in (8);  $\hat{c}_{b,\ell}(d)$  is its estimate, which is defined in (7); and both  $\chi^*$  and  $\alpha_{\max}$  are defined in Section 5.3. Let  $\bar{\mathcal{E}}_{b,\ell}$  be the complement of event  $\mathcal{E}_{b,\ell}$ . Let  $\mathcal{E}$  be the “good event” that all events  $\mathcal{E}_{b,\ell}$  happen; and  $\bar{\mathcal{E}}$  be its complement, the “bad event” that at least one event  $\mathcal{E}_{b,\ell}$  does not happen. Then the expected  $T$ -step regret can be bounded from above as

$$R(T) \leq \mathbb{E} \left[ \sum_{b=1}^{2K} \sum_{\ell=0}^{T-1} \mathbf{R}_{b,\ell} \mathbb{1}\{\mathcal{E}\} \right] + TP(\bar{\mathcal{E}}) \leq \sum_{b=1}^{2K} \mathbb{E} \left[ \sum_{\ell=0}^{T-1} \mathbf{R}_{b,\ell} \mathbb{1}\{\mathcal{E}\} \right] + 4KL(3e + K),$$

where the second inequality is from Lemma 2. Now we apply Lemma 7 to each batch  $b$  and get that

$$\sum_{b=1}^{2K} \mathbb{E} \left[ \sum_{\ell=0}^{T-1} \mathbf{R}_{b,\ell} \mathbb{1}\{\mathcal{E}\} \right] \leq \frac{192K^3L}{(1 - \alpha_{\max})\Delta_{\min}} \log T.$$

This concludes our proof.

### C. Upper Bound on the Probability of Bad Event $\bar{\mathcal{E}}$

**Lemma 2.** Let  $\bar{\mathcal{E}}$  be defined as in the proof of Theorem 1 and  $T \geq 5$ . Then

$$P(\bar{\mathcal{E}}) \leq \frac{4KL(3e + K)}{T}.$$

*Proof.* By the union bound,

$$P(\bar{\mathcal{E}}) \leq \sum_{b=1}^{2K} \sum_{\ell=0}^{T-1} P(\bar{\mathcal{E}}_{b,\ell}).$$

Now we bound the probability of each event in  $\bar{\mathcal{E}}_{b,\ell}$  and then sum them up.

#### Event 1

The probability that event 1 in  $\mathcal{E}_{b,\ell}$  does not happen is bounded as follows. Fix  $\mathbf{I}_b$  and  $\mathbf{B}_{b,\ell}$ . For any  $d \in \mathbf{B}_{b,\ell}$ ,

$$\begin{aligned} P(\bar{\mathcal{c}}_{b,\ell}(d) \notin [\mathbf{L}_{b,\ell}(d), \mathbf{U}_{b,\ell}(d)]) &\leq P(\bar{\mathcal{c}}_{b,\ell}(d) < \mathbf{L}_{b,\ell}(d)) + P(\bar{\mathcal{c}}_{b,\ell}(d) > \mathbf{U}_{b,\ell}(d)) \\ &\leq \frac{2e \lceil \log(T \log^3 T) \log n_\ell \rceil}{T \log^3 T} \\ &\leq \frac{2e \lceil \log^2 T + \log(\log^3 T) \log T \rceil}{T \log^3 T} \\ &\leq \frac{2e \lceil 2 \log^2 T \rceil}{T \log^3 T} \\ &\leq \frac{6e}{T \log T}, \end{aligned}$$

where the second inequality is by Theorem 10 of [Garivier & Cappé \(2011\)](#), the third inequality is from  $T \geq n_\ell$ , the fourth inequality is from  $\log(\log^3 T) \leq \log T$  for  $T \geq 5$ , and the last inequality is from  $\lceil 2 \log^2 T \rceil \leq 3 \log^2 T$  for  $T \geq 3$ . By the union bound,

$$P(\exists d \in \mathbf{B}_{b,\ell} \text{ s.t. } \bar{\mathcal{c}}_{b,\ell}(d) \notin [\mathbf{L}_{b,\ell}(d), \mathbf{U}_{b,\ell}(d)]) \leq \frac{6eL}{T \log T}$$

for any  $\mathbf{B}_{b,\ell}$ . Finally, since the above inequality holds for any  $\mathbf{B}_{b,\ell}$ , the probability that event 1 in  $\mathcal{E}_{b,\ell}$  does not happen is bounded as above.

#### Event 2

The probability that event 2 in  $\mathcal{E}_{b,\ell}$  does not happen is bounded as follows. Fix  $\mathbf{I}_b$  and  $\mathbf{B}_{b,\ell}$ , and let  $k = \mathbf{I}_b(1)$ . If the event does not happen for items  $d$  and  $d^*$ , then it must be true that

$$n_\ell \geq \frac{16K}{\chi^*(k)(1 - \alpha_{\max})\Delta^2} \log T, \quad \hat{\mathcal{c}}_{b,\ell}(d) > \bar{\chi}_{b,\ell}(d)[\alpha(d) + \Delta/4].$$

From the definition of the average examination probability in (12) and a variant of Hoeffding's inequality in Lemma 8, we have that

$$P(\hat{\mathcal{c}}_{b,\ell}(d) > \bar{\chi}_{b,\ell}(d)[\alpha(d) + \Delta/4]) \leq \exp[-n_\ell D_{\text{KL}}(\bar{\chi}_{b,\ell}(d)[\alpha(d) + \Delta/4] \parallel \bar{\mathcal{c}}_{b,\ell}(d))].$$

From Lemma 9,  $\bar{\chi}_{b,\ell}(d) \geq \chi^*(k)/K$  (Lemma 3), and Pinsker's inequality, we have that

$$\begin{aligned} \exp[-n_\ell D_{\text{KL}}(\bar{\chi}_{b,\ell}(d)[\alpha(d) + \Delta/4] \parallel \bar{\mathcal{c}}_{b,\ell}(d))] &\leq \exp[-n_\ell \bar{\chi}_{b,\ell}(d)(1 - \alpha_{\max}) D_{\text{KL}}(\alpha(d) + \Delta/4 \parallel \alpha(d))] \\ &\leq \exp\left[-n_\ell \frac{\chi^*(k)(1 - \alpha_{\max})\Delta^2}{8K}\right]. \end{aligned}$$

From our assumption on  $n_\ell$ , we conclude that

$$\exp\left[-n_\ell \frac{\chi^*(k)(1 - \alpha_{\max})\Delta^2}{8K}\right] \leq \exp[-2 \log T] = \frac{1}{T^2}.$$

Finally, we chain all above inequalities and get that event 2 in  $\mathcal{E}_{b,\ell}$  does not happen for any fixed  $\mathbf{I}_b$ ,  $\mathbf{B}_{b,\ell}$ ,  $d$ , and  $d^*$  with probability of at most  $T^{-2}$ . Since the maximum numbers of items  $d$  and  $d^*$  are  $L$  and  $K$ , respectively, the event does not happen for any fixed  $\mathbf{I}_b$  and  $\mathbf{B}_{b,\ell}$  with probability of at most  $KL T^{-2}$ . In turn, the probability that event 2 in  $\mathcal{E}_{b,\ell}$  does not happen is bounded by  $KL T^{-2}$ .

### Event 3

This bound is analogous to that of event 2.

### Total probability

The maximum number of stages in any batch in BatchRank is  $\log T$  and the maximum number of batches is  $2K$ . Hence, by the union bound,

$$P(\bar{\mathcal{E}}) \leq \left( \frac{6eL}{T \log T} + \frac{KL}{T^2} + \frac{KL}{T^2} \right) (2K \log T) \leq \frac{4KL(3e + K)}{T}.$$

This concludes our proof. ■

## D. Upper Bound on the Regret in Individual Batches

**Lemma 3.** For any batch  $b$ , positions  $\mathbf{I}_b$ , stage  $\ell$ , set  $\mathbf{B}_{b,\ell}$ , and item  $d \in \mathbf{B}_{b,\ell}$ ,

$$\frac{\chi^*(k)}{K} \leq \bar{\chi}_{b,\ell}(d),$$

where  $k = \mathbf{I}_b(1)$  is the highest position in batch  $b$ .

*Proof.* The proof follows from two observations. First, by Assumption 6,  $\chi^*(k)$  is the lowest examination probability of position  $k$ . Second, by the design of `DisplayBatch`, item  $d$  is placed at position  $k$  with probability of at least  $1/K$ . ■

**Lemma 4.** Let event  $\mathcal{E}$  happen and  $T \geq 5$ . For any batch  $b$ , positions  $\mathbf{I}_b$ , set  $\mathbf{B}_{b,0}$ , item  $d \in \mathbf{B}_{b,0}$ , and item  $d^* \in \mathbf{B}_{b,0} \cap [K]$  such that  $\Delta = \alpha(d^*) - \alpha(d) > 0$ , let  $k = \mathbf{I}_b(1)$  be the highest position in batch  $b$  and  $\ell$  be the first stage where

$$\tilde{\Delta}_\ell < \sqrt{\frac{\chi^*(k)(1 - \alpha_{\max})}{K}} \Delta.$$

Then  $\mathbf{U}_{b,\ell}(d) < \mathbf{L}_{b,\ell}(d^*)$ .

*Proof.* From the definition of  $n_\ell$  in `BatchRank` and our assumption on  $\tilde{\Delta}_\ell$ ,

$$n_\ell \geq \frac{16}{\tilde{\Delta}_\ell^2} \log T > \frac{16K}{\chi^*(k)(1 - \alpha_{\max})\Delta^2} \log T. \quad (13)$$

Let  $\mu = \bar{\chi}_{b,\ell}(d)$  and suppose that  $\mathbf{U}_{b,\ell}(d) \geq \mu[\alpha(d) + \Delta/2]$  holds. Then from this assumption, the definition of  $\mathbf{U}_{b,\ell}(d)$ , and event 2 in  $\mathcal{E}_{b,\ell}$ ,

$$\begin{aligned} D_{\text{KL}}(\hat{\mathbf{c}}_{b,\ell}(d) \parallel \mathbf{U}_{b,\ell}(d)) &\geq D_{\text{KL}}(\hat{\mathbf{c}}_{b,\ell}(d) \parallel \mu[\alpha(d) + \Delta/2]) \mathbb{1}\{\hat{\mathbf{c}}_{b,\ell}(d) \leq \mu[\alpha(d) + \Delta/2]\} \\ &\geq D_{\text{KL}}(\mu[\alpha(d) + \Delta/4] \parallel \mu[\alpha(d) + \Delta/2]). \end{aligned}$$

From Lemma 9,  $\mu \geq \chi^*(k)/K$  (Lemma 3), and Pinsker's inequality, we have that

$$\begin{aligned} D_{\text{KL}}(\mu[\alpha(d) + \Delta/4] \parallel \mu[\alpha(d) + \Delta/2]) &\geq \mu(1 - \alpha_{\max})D_{\text{KL}}(\alpha(d) + \Delta/4 \parallel \alpha(d) + \Delta/2) \\ &\geq \frac{\chi^*(k)(1 - \alpha_{\max})\Delta^2}{8K}. \end{aligned}$$

From the definition of  $\mathbf{U}_{b,\ell}(d)$ ,  $T \geq 5$ , and above inequalities,

$$n_\ell = \frac{\log T + 3 \log \log T}{D_{\text{KL}}(\hat{\mathbf{c}}_{b,\ell}(d) \parallel \mathbf{U}_{b,\ell}(d))} \leq \frac{2 \log T}{D_{\text{KL}}(\hat{\mathbf{c}}_{b,\ell}(d) \parallel \mathbf{U}_{b,\ell}(d))} \leq \frac{16K \log T}{\chi^*(k)(1 - \alpha_{\max})\Delta^2}.$$

This contradicts to (13), and therefore it must be true that  $\mathbf{U}_{b,\ell}(d) < \mu[\alpha(d) + \Delta/2]$  holds.

On the other hand, let  $\mu^* = \bar{\chi}_{b,\ell}(d^*)$  and suppose that  $\mathbf{L}_{b,\ell}(d^*) \leq \mu^*[\alpha(d^*) - \Delta/2]$  holds. Then from this assumption, the definition of  $\mathbf{L}_{b,\ell}(d^*)$ , and event 3 in  $\mathcal{E}_{b,\ell}$ ,

$$\begin{aligned} D_{\text{KL}}(\hat{\mathbf{c}}_{b,\ell}(d^*) \parallel \mathbf{L}_{b,\ell}(d^*)) &\geq D_{\text{KL}}(\hat{\mathbf{c}}_{b,\ell}(d^*) \parallel \mu^*[\alpha(d^*) - \Delta/2]) \mathbb{1}\{\hat{\mathbf{c}}_{b,\ell}(d^*) \geq \mu^*[\alpha(d^*) - \Delta/2]\} \\ &\geq D_{\text{KL}}(\mu^*[\alpha(d^*) - \Delta/4] \parallel \mu^*[\alpha(d^*) - \Delta/2]). \end{aligned}$$

From Lemma 9,  $\mu^* \geq \chi^*(k)/K$  (Lemma 3), and Pinsker's inequality, we have that

$$\begin{aligned} D_{\text{KL}}(\mu^*[\alpha(d^*) - \Delta/4] \parallel \mu^*[\alpha(d^*) - \Delta/2]) &\geq \mu^*(1 - \alpha_{\max})D_{\text{KL}}(\alpha(d^*) - \Delta/4 \parallel \alpha(d^*) - \Delta/2) \\ &\geq \frac{\chi^*(k)(1 - \alpha_{\max})\Delta^2}{8K}. \end{aligned}$$

From the definition of  $\mathbf{L}_{b,\ell}(d^*)$ ,  $T \geq 5$ , and above inequalities,

$$n_\ell = \frac{\log T + 3 \log \log T}{D_{\text{KL}}(\hat{\mathbf{c}}_{b,\ell}(d) \parallel \mathbf{L}_{b,\ell}(d^*))} \leq \frac{2 \log T}{D_{\text{KL}}(\hat{\mathbf{c}}_{b,\ell}(d^*) \parallel \mathbf{L}_{b,\ell}(d^*))} \leq \frac{16K \log T}{\chi^*(k)(1 - \alpha_{\max})\Delta^2}.$$

This contradicts to (13), and therefore it must be true that  $\mathbf{L}_{b,\ell}(d^*) > \mu^*[\alpha(d^*) - \Delta/2]$  holds.

Finally, based on inequality (11),

$$\mu^* = \frac{\bar{\mathbf{c}}_{b,\ell}(d^*)}{\alpha(d^*)} \geq \frac{\bar{\mathbf{c}}_{b,\ell}(d)}{\alpha(d)} = \mu,$$

and item  $d$  is guaranteed to be eliminated by the end of stage  $\ell$  because

$$\begin{aligned} \mathbf{U}_{b,\ell}(d) &< \mu[\alpha(d) + \Delta/2] \\ &\leq \mu\alpha(d) + \frac{\mu^*\alpha(d^*) - \mu\alpha(d)}{2} \\ &= \mu^*\alpha(d^*) - \frac{\mu^*\alpha(d^*) - \mu\alpha(d)}{2} \\ &\leq \mu^*[\alpha(d^*) - \Delta/2] \\ &< \mathbf{L}_{b,\ell}(d^*). \end{aligned}$$

This concludes our proof. ■

**Lemma 5.** *Let event  $\mathcal{E}$  happen and  $T \geq 5$ . For any batch  $b$ , positions  $\mathbf{I}_b$  where  $\mathbf{I}_b(2) = K$ , set  $\mathbf{B}_{b,0}$ , and item  $d \in \mathbf{B}_{b,0}$  such that  $d > K$ , let  $k = \mathbf{I}_b(1)$  be the highest position in batch  $b$  and  $\ell$  be the first stage where*

$$\tilde{\Delta}_\ell < \sqrt{\frac{\chi^*(k)(1 - \alpha_{\max})}{K}} \Delta$$

for  $\Delta = \alpha(K) - \alpha(d)$ . Then item  $d$  is eliminated by the end of stage  $\ell$ .

*Proof.* Let  $B^+ = \{k, \dots, K\}$ . Now note that  $\alpha(d^*) - \alpha(d) \geq \Delta$  for any  $d^* \in B^+$ . By Lemma 4,  $\mathbf{L}_{b,\ell}(d^*) > \mathbf{U}_{b,\ell}(d)$  for any  $d^* \in B^+$ ; and therefore item  $d$  is eliminated by the end of stage  $\ell$ . ■

**Lemma 6.** *Let  $\mathcal{E}$  happen and  $T \geq 5$ . For any batch  $b$ , positions  $\mathbf{I}_b$ , and set  $\mathbf{B}_{b,0}$ , let  $k = \mathbf{I}_b(1)$  be the highest position in batch  $b$  and  $\ell$  be the first stage where*

$$\tilde{\Delta}_\ell < \sqrt{\frac{\chi^*(k)(1 - \alpha_{\max})}{K}} \Delta_{\max}$$

for  $\Delta_{\max} = \alpha(s) - \alpha(s+1)$  and  $s = \arg \max_{d \in \{\mathbf{I}_b(1), \dots, \mathbf{I}_b(2)-1\}} [\alpha(d) - \alpha(d+1)]$ . Then batch  $b$  is split by the end of stage  $\ell$ .

*Proof.* Let  $B^+ = \{k, \dots, s\}$  and  $B^- = \mathbf{B}_{b,0} \setminus B^+$ . Now note that  $\alpha(d^*) - \alpha(d) \geq \Delta_{\max}$  for any  $(d^*, d) \in B^+ \times B^-$ . By Lemma 4,  $\mathbf{L}_{b,\ell}(d^*) > \mathbf{U}_{b,\ell}(d)$  for any  $(d^*, d) \in B^+ \times B^-$ ; and therefore batch  $b$  is split by the end of stage  $\ell$ . ■

**Lemma 7.** *Let event  $\mathcal{E}$  happen and  $T \geq 5$ . Then the expected  $T$ -step regret in any batch  $b$  is bounded as*

$$\mathbb{E} \left[ \sum_{\ell=0}^{T-1} \mathbf{R}_{b,\ell} \right] \leq \frac{96K^2L}{(1 - \alpha_{\max})\Delta_{\max}} \log T.$$

*Proof.* Let  $k = \mathbf{I}_b(1)$  be the highest position in batch  $b$ . Choose any item  $d \in \mathbf{B}_{b,0}$  and let  $\Delta = \alpha(k) - \alpha(d)$ .

First, we show that the expected per-step regret of any item  $d$  is bounded by  $\chi^*(k)\Delta$  when event  $\mathcal{E}$  happens. Since event  $\mathcal{E}$  happens, all eliminations and splits up to any stage  $\ell$  of batch  $b$  are correct. Therefore, items  $1, \dots, k-1$  are at positions  $1, \dots, k-1$ ; and position  $k$  is examined with probability  $\chi^*(k)$ . Note that this is the highest examination probability in batch  $b$  (Assumption 4). Our upper bound follows from the fact that the reward is linear in individual items (Section 3.1).

We analyze two cases. First, suppose that  $\Delta \leq 2K\Delta_{\max}$  for  $\Delta_{\max}$  in Lemma 6. Then by Lemma 6, batch  $b$  splits when the number of steps in a stage is at most

$$\frac{16K}{\chi^*(k)(1 - \alpha_{\max})\Delta_{\max}^2} \log T.$$

By the design of `DisplayBatch`, any item in stage  $\ell$  of batch  $b$  is displayed at most  $2n_\ell$  times. Therefore, the maximum regret due to item  $d$  in the last stage before the split is

$$\frac{32K\chi^*(k)\Delta}{\chi^*(k)(1-\alpha_{\max})\Delta_{\max}^2} \log T \leq \frac{64K^2\Delta_{\max}}{(1-\alpha_{\max})\Delta_{\max}^2} \log T = \frac{64K^2}{(1-\alpha_{\max})\Delta_{\max}} \log T.$$

Now suppose that  $\Delta > 2K\Delta_{\max}$ . This implies that item  $d$  is easy to distinguish from item  $K$ . In particular,

$$\alpha(K) - \alpha(d) = \Delta - (\alpha(k) - \alpha(K)) \geq \Delta - K\Delta_{\max} \geq \frac{\Delta}{2},$$

where the equality is from the identity

$$\Delta = \alpha(k) - \alpha(d) = \alpha(k) - \alpha(K) + \alpha(K) - \alpha(d);$$

the first inequality is from  $\alpha(k) - \alpha(K) \leq K\Delta_{\max}$ , which follows from the definition of  $\Delta_{\max}$  and  $k \in [K]$ ; and the last inequality is from our assumption that  $K\Delta_{\max} < \Delta/2$ . Now we apply the derived inequality and, by Lemma 5 and from the design of `DisplayBatch`, the maximum regret due to item  $d$  in the stage where that item is eliminated is

$$\frac{32K\chi^*(k)\Delta}{\chi^*(k)(1-\alpha_{\max})(\alpha(K) - \alpha(d))^2} \log T \leq \frac{128K}{(1-\alpha_{\max})\Delta} \log T \leq \frac{64}{(1-\alpha_{\max})\Delta_{\max}} \log T.$$

The last inequality is from our assumption that  $\Delta > 2K\Delta_{\max}$ .

Because the lengths of the stages quadruple and `BatchRank` resets all click estimators at the beginning of each stage, the maximum expected regret due to any item  $d$  in batch  $b$  is at most 1.5 times higher than that in the last stage, and hence

$$\mathbb{E} \left[ \sum_{\ell=0}^{T-1} \mathbf{R}_{b,\ell} \right] \leq \frac{96K^2 |\mathbf{B}_{b,0}|}{(1-\alpha_{\max})\Delta_{\max}} \log T.$$

This concludes our proof. ■

## E. Technical Lemmas

**Lemma 8.** Let  $(X_1)_{i=1}^n$  be  $n$  i.i.d. Bernoulli random variables,  $\bar{\mu} = \sum_{i=1}^n X_i$ , and  $\mu = \mathbb{E}[\bar{\mu}]$ . Then

$$P(\bar{\mu} \geq \mu + \varepsilon) \leq \exp[-nD_{\text{KL}}(\mu + \varepsilon \parallel \mu)]$$

for any  $\varepsilon \in [0, 1 - \mu]$ , and

$$P(\bar{\mu} \leq \mu - \varepsilon) \leq \exp[-nD_{\text{KL}}(\mu - \varepsilon \parallel \mu)]$$

for any  $\varepsilon \in [0, \mu]$ .

*Proof.* We only prove the first claim. The other claim follows from symmetry.

From inequality (2.1) of [Hoeffding \(1963\)](#), we have that

$$P(\bar{\mu} \geq \mu + \varepsilon) \leq \left[ \left( \frac{\mu}{\mu + \varepsilon} \right)^{\mu + \varepsilon} \left( \frac{1 - \mu}{1 - (\mu + \varepsilon)} \right)^{1 - (\mu + \varepsilon)} \right]^n$$

for any  $\varepsilon \in [0, 1 - \mu]$ . Now note that

$$\begin{aligned} \left[ \left( \frac{\mu}{\mu + \varepsilon} \right)^{\mu + \varepsilon} \left( \frac{1 - \mu}{1 - (\mu + \varepsilon)} \right)^{1 - (\mu + \varepsilon)} \right]^n &= \exp \left[ n \left[ (\mu + \varepsilon) \log \frac{\mu}{\mu + \varepsilon} + (1 - (\mu + \varepsilon)) \log \frac{1 - \mu}{1 - (\mu + \varepsilon)} \right] \right] \\ &= \exp \left[ -n \left[ (\mu + \varepsilon) \log \frac{\mu + \varepsilon}{\mu} + (1 - (\mu + \varepsilon)) \log \frac{1 - (\mu + \varepsilon)}{1 - \mu} \right] \right] \\ &= \exp[-nD_{\text{KL}}(\mu + \varepsilon \parallel \mu)]. \end{aligned}$$

This concludes the proof. ■

**Lemma 9.** For any  $c, p, q \in [0, 1]$ ,

$$c(1 - \max\{p, q\})D_{\text{KL}}(p \parallel q) \leq D_{\text{KL}}(cp \parallel cq) \leq cD_{\text{KL}}(p \parallel q). \quad (14)$$

*Proof.* The proof is based on differentiation. The first two derivatives of  $D_{\text{KL}}(cp \parallel cq)$  with respect to  $q$  are

$$\frac{\partial}{\partial q} D_{\text{KL}}(cp \parallel cq) = \frac{c(q - p)}{q(1 - cq)}, \quad \frac{\partial^2}{\partial q^2} D_{\text{KL}}(cp \parallel cq) = \frac{c^2(q - p)^2 + cp(1 - cp)}{q^2(1 - cq)^2};$$

and the first two derivatives of  $cD_{\text{KL}}(p \parallel q)$  with respect to  $q$  are

$$\frac{\partial}{\partial q} [cD_{\text{KL}}(p \parallel q)] = \frac{c(q - p)}{q(1 - q)}, \quad \frac{\partial^2}{\partial q^2} [cD_{\text{KL}}(p \parallel q)] = \frac{c(q - p)^2 + cp(1 - p)}{q^2(1 - q)^2}.$$

The second derivatives show that  $D_{\text{KL}}(cp \parallel cq)$  and  $cD_{\text{KL}}(p \parallel q)$  are convex in  $q$  for any  $p$ . Their minima are at  $q = p$ .

Now we fix  $p$  and  $c$ , and prove (14) for any  $q$ . The upper bound is derived as follows. Since

$$D_{\text{KL}}(cp \parallel cx) = cD_{\text{KL}}(p \parallel x) = 0$$

when  $x = p$ , the upper bound holds when  $cD_{\text{KL}}(p \parallel x)$  increases faster than  $D_{\text{KL}}(cp \parallel cx)$  for any  $p < x \leq q$ , and when  $cD_{\text{KL}}(p \parallel x)$  decreases faster than  $D_{\text{KL}}(cp \parallel cx)$  for any  $q \leq x < p$ . This follows from the definitions of  $\frac{\partial}{\partial x} D_{\text{KL}}(cp \parallel cx)$  and  $\frac{\partial}{\partial x} [cD_{\text{KL}}(p \parallel x)]$ . In particular, both derivatives have the same sign and  $|\frac{\partial}{\partial x} D_{\text{KL}}(cp \parallel cx)| \leq |\frac{\partial}{\partial x} [cD_{\text{KL}}(p \parallel x)]|$  for any feasible  $x \in [\min\{p, q\}, \max\{p, q\}]$ .

The lower bound is derived as follows. The ratio of  $\frac{\partial}{\partial x} [cD_{\text{KL}}(p \parallel x)]$  and  $\frac{\partial}{\partial x} D_{\text{KL}}(cp \parallel cx)$  is bounded from above as

$$\frac{\frac{\partial}{\partial x} [cD_{\text{KL}}(p \parallel x)]}{\frac{\partial}{\partial x} D_{\text{KL}}(cp \parallel cx)} = \frac{1 - cx}{1 - x} \leq \frac{1}{1 - x} \leq \frac{1}{1 - \max\{p, q\}}$$

for any  $x \in [\min\{p, q\}, \max\{p, q\}]$ . Therefore, we get a lower bound on  $D_{\text{KL}}(cp \parallel cx)$  when we multiply  $cD_{\text{KL}}(p \parallel x)$  by  $1 - \max\{p, q\}$ . ■
